# Supplementary material for: Transcriptomic profiling identifies differentially expressed genes associated with programmed cell death of nucellar cells in Ginkgo biloba L
Source: BMC Plant Biol. 2019 Feb 28;19:91. doi: 10.1186/s12870-019-1671-8 (PMC6396491; doi:10.1186/s12870-019-1671-8)
Supplement: Supplementary file 5 — Table S5.The significantly DEGs involved in the nucellar PCD during pollen chamber formation in G. biloba ovules. (XLSX 39 kb) [file 12870_2019_1671_MOESM5_ESM.xlsx]

## Sheet: Sheet1
Table S5 The significantly DEGs involved in the nucellar PCD during pollen chamber formation in G. biloba ovules
Gene ID	Gene name	Pathway	pre-PCF FPKM	post-PCF FPKM	log2 Ratio (post-PCF/pre-PCF)	Up- or Down-Regulation (post-PCF/pre-PCF)	P-value	FDR	Significant	KEGG Orthology	GO Terms (C-cellular component; F-molecular function; P- biological process)	Blast nr
Gb_26499	MPK6	Ethylene signaling	71.4848	52.7467	-0.438557	Down	0.003	0.0154333	yes	K14512	P:root development; C:trans-Golgi network; P:mitotic nuclear division; P:response to hydrogen peroxide; P:induced systemic resistance, jasmonic acid mediated signaling pathway; P:camalexin biosynthetic process; P:response to salt stress; P:conjugation; P:regulation of stomatal complex development; C:phragmoplast; P:protein phosphorylation; P:MAPK cascade; P:response to UV-B; F:MAP kinase activity…	MPK6; mitogen-activated protein kinase 6 [EC:2.7.11.24]
Gb_03292	EIN3	Ethylene signaling	23.7427	16.9473	-0.486429	Down	0.0007	0.00453466	yes	K14514	P:regulation of transcription, DNA-templated; C:nucleus; F:sequence-specific DNA binding transcription factor activity	EIN3; ethylene-insensitive protein 3
Gb_08309	EIN3	Ethylene signaling	79.2641	48.5072	-0.70847	Down	5e-05	0.000439452	yes	K14514	P:regulation of transcription, DNA-templated; C:nucleus; F:sequence-specific DNA binding transcription factor activity	EIN3; ethylene-insensitive protein 3
Gb_28304	ETR	Ethylene signaling	8.6659	12.1875	0.491983	Up	0.0029	0.015007	yes	K14509	P:ethylene-activated signaling pathway; F:phosphorelay response regulator activity; C:integral component of membrane; P:peptidyl-histidine phosphorylation; F:metal ion binding; P:signal transduction by phosphorylation; F:ATP binding; C:endoplasmic reticulum membrane; F:phosphorelay sensor kinase activity	signal transduction histidine hybrid- ethylene sensor isoform 1
Gb_36440	ETR	Ethylene signaling	50.086	37.8169	-0.405375	Down	0.0028	0.0145879	yes	K14509	P:ethylene-activated signaling pathway; F:phosphorelay response regulator activity; C:integral component of membrane; P:peptidyl-histidine phosphorylation; F:metal ion binding; P:signal transduction by phosphorylation; F:ATP binding; C:endoplasmic reticulum membrane; F:phosphorelay sensor kinase activity	ETR, ERS; ethylene receptor [EC:2.7.13.-]
Gb_08479	EBF1/2	Ethylene signaling	4.86989	13.078	1.42519	Up	5e-05	0.000439452	yes	K14515	F:EIN3 binding	EBF1/2; EIN3-binding F-box protein
Gb_32846	EBF1/2	Ethylene signaling	23.5619	17.0703	-0.464967	Down	0.0011	0.00665177	yes	K14515	F:EIN3 binding	EBF1/2; EIN3-binding F-box protein
Gb_41401	ACS	Ethylene biosynthesis	9.03254	4.67308	-0.950757	Down	0.0078	0.0334506	yes	K01895	F:catalytic activity; P:ethylene metabolic process; P:ethylene biosynthetic process; F:1-aminocyclopropane-1-carboxylate synthase activity; P:cellular amino acid metabolic process; P:nitrogen compound metabolic process; P:cellular amino acid biosynthetic process; P:organic acid biosynthetic process; P:1-aminocyclopropane-1-carboxylate metabolic process; P:alkene biosynthetic process; P:monocarbox…	1-aminocyclopropane-1-carboxylate synthase
Gb_08184	ACO1	Ethylene biosynthesis	7.26021	4.18754	-0.793909	Down	0.0097	0.0398374	yes	K05933	F:catalytic activity; P:ethylene metabolic process; P:ethylene biosynthetic process; F:1-aminocyclopropane-1-carboxylate oxidase activity; F:oxidoreductase activity; F:oxidoreductase activity, acting on the CH-NH2 group of donors; P:cellular alkene metabolic process; P:cellular biosynthetic process; P:oxidation-reduction process; P:organic substance metabolic process	1-aminocyclopropane-1-carboxylate oxidase
Gb_31357	ACO1	Ethylene biosynthesis	2.10626	0.213444	-3.30275	Down	0.0001	0.000825673	yes	K05933	P:ethylene metabolic process; P:ethylene biosynthetic process; F:1-aminocyclopropane-1-carboxylate oxidase activity; F:oxidoreductase activity; F:oxidoreductase activity, acting on the CH-NH2 group of donors; P:cellular alkene metabolic process; P:cellular biosynthetic process; P:oxidation-reduction process; P:organic substance metabolic process	1-aminocyclopropane-1-carboxylate oxidase
Gb_34464	MYB-like	Transcription factor	3.42618	11.1241	1.69901	Up	5e-05	0.000439452	yes	K09422	F:chromatin binding; F:DNA binding; P:positive regulation of programmed cell death; P:response to salicylic acid; P:response to ethylene; P:positive regulation of transcription, DNA-templated; P:pollen sperm cell differentiation; P:negative regulation of growth; P:positive regulation of abscisic acid-activated signaling pathway	transcription factor MYB, transcription factor gamyb-like isoform x1
Gb_12778	MADS-box transcription enhancer factor 2C (MEF2C)	Transcription factor	7.95205	2.71884	-1.54833	Down	0.0112	0.0445946	yes	K04454	P:regulation of transcription, DNA-templated; F:sequence-specific DNA binding transcription factor activity; F:DNA binding; P:transcription, DNA-templated; F:protein dimerization activity; C:nucleus	MADS-box transcription enhancer factor 2C
Gb_19178	MADS-box transcription enhancer factor 2C (MEF2C)	Transcription factor	1.40602	0.327221	-2.10328	Down	0.0006	0.00397071	yes	K04454	F:binding; P:regulation of reproductive process; P:negative regulation of post-embryonic development	MADS-box transcription enhancer factor 2C
Gb_33415	bHLH113-like	Transcription factor	98.4034	65.7825	-0.581003	Down	0.0001	0.000825673	yes	no KO assigned	F:protein dimerization activity; P:regulation of transcription, DNA-templated; F:sequence-specific DNA binding transcription factor activity	transcription factor bHLH113-like
Gb_05320	bHLH66-like	Transcription factor	29.2828	8.1056	-1.85306	Down	5e-05	0.000439452	yes	no KO assigned	F:protein dimerization activity; P:regulation of transcription, DNA-templated	transcription factor bHLH66-like
Gb_06063	bHLH112-like isoform X1	Transcription factor	0.934723	0.0331841	-4.81597	Down	0.0113	0.0448836	yes	no KO assigned	F:protein dimerization activity	transcription factor bHLH112-like isoform X1
Gb_13728	bHLH18-like	Transcription factor	13.3582	5.65671	-1.23969	Down	5e-05	0.000439452	yes	no KO assigned	F:protein dimerization activity; P:regulation of transcription, DNA-templated; F:oxidoreductase activity	transcription factor bHLH18-like
Gb_20300	bHLH transcription factor Upa20 (UPA20)	Transcription factor	4.64076	1.72396	-1.42863	Down	5e-05	0.000439452	yes	K18878	F:protein dimerization activity; P:regulation of transcription, DNA-templated; F:sequence-specific DNA binding transcription factor activity	bHLH transcription factor Upa20
Gb_01289	bHLH148-like	Transcription factor	49.4338	15.2154	-1.69996	Down	5e-05	0.000439452	yes	no KO assigned	F:protein dimerization activity; P:regulation of transcription, DNA-templated; F:sequence-specific DNA binding transcription factor activity	transcription factor bHLH148-like
Gb_22607	NAC domain-containing protein 86-like	Transcription factor	3.65117	0.420941	-3.11667	Down	5e-05	0.000439452	yes	no KO assigned	P:regulation of transcription, DNA-templated; F:DNA binding	NAC domain-containing protein 86-like
Gb_13957	NAC domain-containing protein 7-like	Transcription factor	2.96264	0.0520379	-5.83118	Down	0.00605	0.0045801	yes	no KO assigned	P:regulation of transcription, DNA-templated; F:DNA binding	NAC domain-containing protein 7-like
Gb_40805	NAC domain-containing protein 7-like	Transcription factor	3.53961	1.49219	-1.24616	Down	0.00125	0.00740733	yes	no KO assigned	P:regulation of transcription, DNA-templated; F:DNA binding	NAC domain-containing protein 7-like
Gb_41540	NAC domain-containing protein 67-like	Transcription factor	69.1294	28.2872	-1.28915	Down	5e-05	0.000439452	yes	no KO assigned	P:regulation of transcription, DNA-templated; F:DNA binding; P:transcription, DNA-templated; C:nucleus	NAC domain-containing protein 67-like
Gb_20625	NAC transcription factor 29	Transcription factor	2.7225	0.392072	-2.79574	Down	5e-05	0.000439452	yes	no KO assigned	P:inflorescence morphogenesis; P:negative regulation of cell size; P:leaf morphogenesis; P:response to chitin; F:sequence-specific DNA binding transcription factor activity; C:nucleus; P:defense response, incompatible interaction; P:MAPK cascade	NAC transcription factor 29
Gb_05670	NAC domain-containing protein 78-like	Transcription factor	49.4558	23.0639	-1.1005	Down	5e-05	0.000439452	yes	no KO assigned	P:regulation of transcription, DNA-templated; F:DNA binding	NAC domain-containing protein 78-like
Gb_37720	NAC domain-containing protein 94-like	Transcription factor	6.85214	2.61157	-1.39163	Down	0.00015	0.00118546	yes	no KO assigned	P:regulation of transcription, DNA-templated; F:DNA binding; P:negative regulation of cell size; P:response to chitin; P:leaf morphogenesis; P:inflorescence morphogenesis	NAC domain-containing protein 94-like
Gb_02849	NAC transcription factor 25	Transcription factor	45.8438	19.3416	-1.24502	Down	5e-05	0.000439452	yes	no KO assigned	P:regulation of transcription, DNA-templated; F:DNA binding	NAC transcription factor 25
Gb_00530	NAC domain-containing protein 75-like	Transcription factor	2.22077	0.317921	-2.80432	Down	5e-05	0.000439452	yes	no KO assigned	P:regulation of transcription, DNA-templated; F:DNA binding	NAC domain-containing protein 75-like
Gb_18916	NAC domain-containing protein 72-like	Transcription factor	51.8144	11.1937	-2.21066	Down	5e-05	0.000439452	yes	no KO assigned	P:multidimensional cell growth; P:response to hypoxia; P:positive regulation of transcription, DNA-templated; P:response to jasmonic acid; P:response to salicylic acid; P:response to fungus; P:response to water deprivation; P:response to light stimulus; P:response to wounding; F:DNA binding; F:protein histidine kinase binding; P:regulation of cell size; P:response to sucrose; P:leaf senescence; P…	NAC domain-containing protein 72-like
Gb_12202	NAC transcription factor-like 9	Transcription factor	29.3899	6.6421	-2.14561	Down	5e-05	0.000439452	yes	no KO assigned	P:inflorescence morphogenesis; P:negative regulation of cell size; P:leaf morphogenesis; P:regulation of transcription, DNA-templated; F:DNA binding; P:response to chitin; F:sequence-specific DNA binding transcription factor activity; C:nucleus; P:defense response, incompatible interaction; P:MAPK cascade	NAC transcription factor-like 9
Gb_01127	NAC domain-containing protein 62-like	Transcription factor	1.32863	0.473386	-1.48885	Down	0.00185	0.0103128	yes	no KO assigned	P:regulation of transcription, DNA-templated; F:DNA binding	NAC domain-containing protein 62-like
Gb_17883	NAC domain-containing protein 68-like	Transcription factor	44.6578	5.79902	-2.94503	Down	5e-05	0.000439452	yes	no KO assigned	P:regulation of transcription, DNA-templated; F:DNA binding	NAC domain-containing protein 68-like
Gb_33670	SENESCENCE-ASSOCIATED PROTEIN	PCD	34.6339	21.1762	-0.70974	Down	0.04427	0.046714	yes	no KO assigned	F:hydrolase activity, acting on carbon-nitrogen (but not peptide) bonds, in linear amides; C:integral component of membrane; P:ceramide metabolic process	senescence/dehydration-associated protein At4g35985, chloroplastic-like
Gb_24750	VPE	PCD	23.3825	58.0294	1.31136	Up	5e-05	0.000439452	yes	K01369	F:cysteine-type endopeptidase activity; P:proteolysis	vacuolar processing enzyme
Gb_19399	RD21A	PCD	3.83593	0.358746	-3.41854	Down	5e-05	0.000439452	yes	no KO assigned	C:intracellular membrane-bounded organelle; C:cytoplasmic part; F:hydrolase activity	cysteine proteinase RD21A-like
Gb_10969	MC2	PCD	54.4222	32.852	-0.728214	Down	0.014869	0.017083	yes	no KO assigned	P:programmed cell death; P:proteolysis; F:cysteine-type endopeptidase activity; C:cell part; P:response to hydrogen peroxide	metacaspase type II
Gb_12947	MC6	PCD	3.52615	1.04335	-1.75687	Down	5e-05	0.000439452	yes	no KO assigned	C:cell part; P:response to hydrogen peroxide; P:programmed cell death; P:proteolysis; F:cysteine-type endopeptidase activity	metacaspase 6
Gb_05704	ASPARTIC PROTEASE IN GUARD CELL 2-like	PCD	22.7386	14.258	-0.673369	Down	0.0006	0.00397071	yes	no KO assigned	P:proteolysis; F:hydrolase activity; F:aspartic-type endopeptidase activity; F:peptidase activity; C:apoplast; F:DNA binding	protein aspartic protease in guard cell 2-like
Gb_34875	ENDOGLUCANASE 23-like	Recycling of carbohydrates	4.20709	1.02438	-2.03807	Down	5e-05	0.000439452	yes	K01179	P:carbohydrate metabolic process; F:hydrolase activity, hydrolyzing O-glycosyl compounds	endoglucanase 23-like
Gb_39595	PECTINESTERASE 8	Recycling of carbohydrates	1.55036	0	#NAME?	Down	5e-05	0.000439452	yes	no KO assigned	F:hydrolase activity, acting on ester bonds	probable pectinesterase 8
Gb_15573	ENDOGLUCANASE 17	Recycling of carbohydrates	96.7293	35.0629	-1.46401	Down	5e-05	0.000439452	yes	no KO assigned	P:carbohydrate metabolic process; F:hydrolase activity, hydrolyzing O-glycosyl compounds; P:response to nematode	endoglucanase 17
Gb_04597	XYLOGLUCAN ENDOTRANSGLUCOSYLASE/HYDROLASE 9	Recycling of carbohydrates	91.3842	62.5681	-0.546517	Down	5e-05	0.000439452	yes	K08235	F:hydrolase activity, hydrolyzing O-glycosyl compounds; P:cellular glucan metabolic process; C:apoplast; C:cell wall; F:xyloglucan:xyloglucosyl transferase activity	xyloglucan endotransglucosylase/hydrolase protein 9
Gb_32012	QUARTET 1 (QRT1)	Recycling of carbohydrates	1.60763	0.984026	-0.708166	Down	0.0071706	0.018707	yes	K01051	F:hydrolase activity, acting on ester bonds; C:cell part	pectinesterase QRT1
Gb_34158	XYLOGLUCAN ENDOTRANSGLUCOSYLASE/HYDROLASE 7	Recycling of carbohydrates	0.732693	0.160335	-2.19212	Down	0.013755	0.042239	yes	K08235	P:metabolic process; F:hydrolase activity	probable xyloglucan endotransglucosylase/hydrolase protein 7
Gb_25376	RRP45	Apoptosis	49.5841	35.8373	-0.468418	Down	0.00105	0.00639671	yes	K03678	F:exonuclease activity; P:nucleic acid phosphodiester bond hydrolysis; C:intracellular part	exosome complex component RRP45, protein RRP45A-like isoform X1
Gb_16957	WRNEXO	Apoptosis	11.6308	6.0659	-0.93916	Down	0.021448	0.025894	yes	no KO assigned	P:nucleic acid phosphodiester bond hydrolysis; F:nucleic acid binding; F:3'-5' exonuclease activity	Werner Syndrome-like exonuclease
Gb_26591	YELLOW LEAF-SPECIFIC GENE 9 (YLS9)	PCD	16.8723	6.0721	-1.47439	Down	5e-05	0.000439452	yes	no KO assigned	P:cellular response to oxygen-containing compound; P:negative regulation of biological process; P:defense response to virus; P:regulation of programmed cell death; C:chloroplast; P:cellular response to organic substance; P:cellular response to acid chemical; P:membrane organization; P:single-organism metabolic process; P:signal transduction; P:leaf senescence; P:response to endogenous stimulus; P…	protein YLS9-like
Gb_27324	CATIONIC AMINO ACID TRANSPORTER 1 (CAT1)	PCD	4.59083	2.33319	-0.976451	Down	0.00045	0.00310795	yes	K13863	P:regulation of plant-type hypersensitive response; P:lysine transport; C:integral component of membrane; F:L-lysine transmembrane transporter activity; P:ammonium transport; P:L-glutamate import; P:amino acid transmembrane transport; P:nucleotide transport; P:membrane fusion; P:protein targeting to membrane; P:negative regulation of programmed cell death; P:proline transport; P:ER to Golgi vesic…	cationic amino acid transporter 1-like
Gb_18058	DAD1	PCD	373.916	276.21	-0.43695	Down	0.00825	0.0350193	yes	K12668	C:integral component of membrane; C:oligosaccharyltransferase complex; P:negative regulation of programmed cell death; P:protein glycosylation; F:dolichyl-diphosphooligosaccharide-protein glycotransferase activity	dolichyl-diphosphooligosaccharide--protein glycosyltransferase subunit dad1
Gb_13122	CRY1	PCD	13.2549	17.9668	0.438812	Up	0.0054	0.0249502	yes	K02295	P:detection of light stimulus; F:blue light photoreceptor activity; P:response to water deprivation; P:regulation of meristem growth; F:protein kinase activity; P:circadian regulation of calcium ion oscillation; P:stomatal movement; F:DNA photolyase activity; P:regulation of unidimensional cell growth; P:photomorphogenesis; P:protein autophosphorylation; P:anthocyanin-containing compound metaboli…	cryptochrome-1 isoform x1
Gb_18059	CYTOCHROME C (CYTC-1)	Apoptosis	438.327	279.239	-0.650505	Down	0.00025	0.00186297	yes	K08738	C:mitochondrial intermembrane space; F:copper ion binding; C:respiratory chain; F:electron carrier activity; F:iron ion binding; F:heme binding; C:vacuolar membrane; C:cytosol; P:oxidation-reduction process	cytochrome c
Gb_26423	CYTOCHROME C (CYTC-1)	Apoptosis	60.9731	29.1162	-1.06635	Down	0.00085	0.00534003	yes	K08738	C:mitochondrial intermembrane space; F:copper ion binding; C:respiratory chain; F:electron carrier activity; F:iron ion binding; F:heme binding; C:vacuolar membrane; C:cytosol; P:oxidation-reduction process	cytochrome c
Gb_05750	LESION SIMULATING DISEASE 1 (LSD1)	Apoptosis	66.6905	141.756	1.08785	Up	0.0222504	0.029404	yes	no KO assigned	P:response to hypoxia; P:systemic acquired resistance, salicylic acid mediated signaling pathway; P:regulation of 1-aminocyclopropane-1-carboxylate metabolic process; P:plant-type hypersensitive response; P:response to molecule of oomycetes origin; P:regulation of ethylene-activated signaling pathway; P:regulation of programmed cell death; P:regulation of hydrogen peroxide metabolic process; P:ae…	protein lsd1-like
Gb_09899	MAP2K6	Apoptosis	54.9594	40.9329	-0.425104	Down	0.0053	0.0245807	yes	K04433	P:protein phosphorylation; F:ATP binding; F:protein serine/threonine kinase activity	mitogen-activated protein kinase kinase 6
Gb_35649	MAP3K7	Apoptosis	1.08878	1.88078	0.788619	Up	0.00255	0.0134975	yes	K04427	F:kinase activity	mitogen-activated protein kinase kinase kinase 7 [EC:2.7.11.25]
Gb_39729	MAP3K7	Apoptosis	1.93603	3.18432	0.717882	Up	0.00055	0.00368554	yes	K04427	P:response to stimulus; F:kinase activity; P:cellular metabolic process	mitogen-activated protein kinase kinase kinase 7 [EC:2.7.11.25]
Gb_31522	AUTOPHAGY-RELATED PROTEIN 5 (ATG5)	Autophagy	9.42096	3.26752	-1.52768	Down	0.021604	0.034309	yes	K08339	C:cytoplasm; P:autophagy	autophagy protein 5
Gb_08297	AUTOPHAGY-RELATED 8C	Autophagy	32.8694	17.9774	-0.870561	Down	0.037747	0.040109	yes	K08341	C:autophagic vacuole; P:defense response to fungus; P:cellular response to starvation; P:autophagy	autophagy-related protein 8c
Gb_04391	AUTOPHAGY-RELATED 16-1	Autophagy	10.5127	15.4402	0.554561	Up	0.00125	0.00740733	yes	K17890	C:autophagic vacuole; P:cellular response to starvation; P:autophagy	autophagy-related protein 16-1
Gb_39853	KNOLLE	Autophagy	2.07137	1.35325	-0.61416	Down	0.00745	0.0190096	yes	K08486	C:trans-Golgi network; C:transport vesicle; P:regulation of stomatal movement; P:jasmonic acid mediated signaling pathway; P:negative regulation of cellular defense response; F:SNAP receptor activity; P:transpiration; P:protein targeting to plasma membrane; P:regulation of plant-type hypersensitive response; P:maintenance of protein location in plasma membrane; C:phragmoplast; P:defense response …	syntaxin-related protein knolle
Gb_01086	CAM	Calcium signaling, cAMP signaling, Ras signaling	35.4844	0.673236	-5.71993	Down	0.0029	0.015007	yes	K02183	P:mycelium development; F:calcium ion binding; F:transferase activity; F:enzyme binding	calmodulin
Gb_03898	CAM	Calcium signaling, cAMP signaling, Ras signaling	19.8251	4.55576	-2.12156	Down	0.00055	0.00368554	yes	K02183	P:single-organism process; F:calcium ion binding; C:intracellular part	calmodulin
Gb_09202	CAM	Calcium signaling, cAMP signaling, Ras signaling	122.553	43.6299	-1.49002	Down	5e-05	0.000439452	yes	K02183	F:calcium ion binding	calmodulin
Gb_13855	CAM	Calcium signaling, cAMP signaling, Ras signaling	38.4989	10.4601	-1.87992	Down	5e-05	0.000439452	yes	K02183	P:oxidation-reduction process; F:oxidoreductase activity; F:calcium ion binding; F:2-alkenal reductase [NAD(P)] activity	calmodulin
Gb_13856	CAM	Calcium signaling, cAMP signaling, Ras signaling	12.4005	3.88077	-1.67598	Down	5e-05	0.000439452	yes	K02183	P:oxidation-reduction process; F:oxidoreductase activity; F:calcium ion binding; F:2-alkenal reductase [NAD(P)] activity	calmodulin
Gb_15575	CAM	Calcium signaling, cAMP signaling, Ras signaling	1.8183	0.355538	-2.35452	Down	0.01075	0.043153	yes	K02183	F:calcium ion binding	calmodulin
Gb_16484	CAM	Calcium signaling, cAMP signaling, Ras signaling	19.2352	9.18094	-1.06703	Down	0.0005	0.00340536	yes	K02183	F:calcium ion binding; C:peroxisome; C:cytoplasm; P:double fertilization forming a zygote and endosperm; P:response to cold; C:nucleus	calmodulin
Gb_22573	CAM	Calcium signaling, cAMP signaling, Ras signaling	21.1817	5.37367	-1.97884	Down	5e-05	0.000439452	yes	K02183	F:calcium ion binding; P:oxidation-reduction process; F:oxidoreductase activity; F:2-alkenal reductase [NAD(P)] activity	calmodulin
Gb_30717	CAM	Calcium signaling, cAMP signaling, Ras signaling	45.6909	64.0016	0.486202	Up	0.00135	0.00788754	yes	K02183	P:calcium-mediated signaling; C:plasma membrane; C:vacuolar membrane; F:calcium ion binding; P:regulation of photomorphogenesis; C:nucleus	calmodulin
Gb_30819	CAM	Calcium signaling, cAMP signaling, Ras signaling	489.301	238.852	-1.03461	Down	5e-05	0.000439452	yes	K02183	P:calcium-mediated signaling; C:plasma membrane; C:vacuolar membrane; F:calcium ion binding; P:regulation of photomorphogenesis; C:nucleus	calmodulin
Gb_35180	CAM	Calcium signaling, cAMP signaling, Ras signaling	410.031	251.682	-0.704134	Down	5e-05	0.000439452	yes	K02183	C:cytoplasm; F:metal ion binding; C:intracellular membrane-bounded organelle	calmodulin
Gb_35768	MCU	Calcium signaling	6.13424	11.865	0.951759	Up	0.0001	0.000825673	yes	K20858	-	calcium uniporter protein, mitochondrial
Gb_12595	VDAC2	Calcium signaling	216.58	141.629	-0.612783	Down	5e-05	0.000439452	yes	K15040	P:transmembrane transport; P:regulation of anion transport; P:anion transport; P:response to bacterium; C:mitochondrial outer membrane; C:cell periphery; F:voltage-gated anion channel activity; C:chloroplast; C:vacuole; P:response to stress	voltage-dependent anion channel protein 2
Gb_20078	VDAC2	Calcium signaling	181.727	130.675	-0.475788	Down	0.001	0.00614089	yes	K15040	P:transmembrane transport; P:regulation of anion transport; P:regulation of seed germination; C:cell wall; C:nucleolus; P:defense response to bacterium; P:response to cold; C:chloroplast envelope; P:anion transport; C:mitochondrial outer membrane; C:vacuolar membrane; P:aerobic respiration; F:voltage-gated anion channel activity; C:plasma membrane	voltage-dependent anion channel protein 2
Gb_41359	VDAC2	Calcium signaling	229.403	129.98	-0.81959	Down	5e-05	0.000439452	yes	K15040	P:anion transport; F:voltage-gated anion channel activity; P:transmembrane transport; P:regulation of anion transport; C:mitochondrial outer membrane	voltage-dependent anion channel protein 2
Gb_04320	CBL	Calcium signaling	21.6885	33.547	0.629254	Up	0.00085	0.00534003	yes	K06268	F:calcium ion binding; P:cell communication; P:response to inorganic substance	calcineurin B-like protein
Gb_19459	CBL	Calcium signaling	7.27702	1.35966	-2.4201	Down	5e-05	0.000439452	yes	K06268	F:calcium ion binding; P:cell communication; P:response to inorganic substance	calcineurin B-like protein
Gb_19683	CBL	Calcium signaling	4.47596	6.98744	0.642567	Up	0.0006	0.00397071	yes	K06268	F:calcium ion binding; P:cell communication; P:response to inorganic substance	calcineurin B-like protein
Gb_24001	CBL	Calcium signaling	1.65742	4.41333	1.41293	Up	0.0014	0.00815056	yes	K06268	F:calcium ion binding; P:cell communication; P:response to inorganic substance	calcineurin B-like protein
Gb_31158	CBL	Calcium signaling	0.978862	0.175077	-2.48311	Down	0.00635	0.0283623	yes	K06268	F:calcium ion binding; P:cell communication; P:response to inorganic substance	calcineurin B-like protein
Gb_11259	CDPK	Calcium signaling	70.6726	23.6693	-1.57813	Down	5e-05	0.000439452	yes	K13412	F:protein kinase activity; P: cellular protein modification process; P:protein metabolic process	calcium-dependent protein kinase
Gb_22778	CDPK	Calcium signaling	16.2084	21.7754	0.42596	Up	0.0059	0.0267319	yes	K13412	F:protein kinase activity; P: cellular protein modification process; P:protein metabolic process	calcium-dependent protein kinase
Gb_26648	CDPK	Calcium signaling	11.4535	17.1735	0.5844	Up	0.00035	0.0024938	yes	K13412	F:protein kinase activity; P: cellular protein modification process; P:protein metabolic process	calcium-dependent protein kinase
Gb_24001	PPP3R	Calcium signaling	1.65742	4.41333	1.41293	Up	0.0014	0.00815056	yes	K06268	C:cytoplasm; P:response to water deprivation; P:response to cold; P:stomatal movement; F:calcium ion binding; P:potassium ion import; P:response to salt stress; F:kinase binding	serine/threonine-protein phosphatase 2B catalytic subunit [EC:3.1.3.16]
Gb_25081	HSC70-1	Longevity regulating	4.10919	1.37539	-1.57902	Down	5e-05	0.000439452	yes	K03283	P:response to virus; C:cell wall; P:oxidation-reduction process; C:plasmodesma; P:response to heat; C:vacuolar membrane; F:protease binding; F:ATP binding; F:2-alkenal reductase [NAD(P)] activity; C:chloroplast; P:response to cadmium ion; C:cytosolic ribosome; P:response to karrikin; C:Golgi apparatus; C:plasma membrane; C:apoplast	heat shock 70kDa protein 1/2/6/8
Gb_01012	HSC70-1	Longevity regulating	88.3867	26.9372	-1.71423	Down	5e-05	0.000439452	yes	K03283	P:response to virus; C:cell wall; C:plasmodesma; P:response to heat; C:vacuolar membrane; F:protease binding; F:ATP binding; C:chloroplast; P:response to cadmium ion; C:cytosolic ribosome; P:response to karrikin; C:Golgi apparatus; C:plasma membrane; C:apoplast	heat shock 70kDa protein 1/2/6/8
Gb_10862	CSD1	Longevity regulating	408.444	98.5604	-2.05106	Down	5e-05	0.000439452	yes	K04565	F:copper ion binding; P:cellular response to light stimulus; P:response to ozone; F:zinc ion binding; P:response to salt stress; F:superoxide dismutase activity; P:response to copper ion; C:cytoplasm; P:removal of superoxide radicals	superoxide dismutase, Cu-Zn family [EC:1.15.1.1]
Gb_18841	FSD1, MSD1	Longevity regulating	34.1155	49.0419	0.523588	Up	0.0014	0.00815056	yes	K04564	F:metal ion binding; P:removal of superoxide radicals; C:chloroplast nucleoid; F:superoxide dismutase activity; P:oxidation-reduction process; P:response to UV	superoxide dismutase, Fe-Mn family [EC:1.15.1.1]
Gb_38467	CAT	Longevity regulating	0.980584	2.82818	1.52816	Up	5e-05	0.000439452	yes	K03781	C:cell wall; P:hydrogen peroxide catabolic process; P:oxidation-reduction process; C:mitochondrion; F:cobalt ion binding; P:response to light stimulus; F:catalase activity; C:chloroplast envelope; F:heme binding; P:cellular response to sulfate starvation; P:cellular response to nitrogen starvation; P:response to cadmium ion; C:cytosolic ribosome; P:cellular response to phosphate starvation; P:res…	catalase [EC:1.11.1.6]
Gb_12927	DnaK	Longevity regulating	82.0396	48.5236	-0.757633	Down	5e-05	0.000439452	yes	K04043	P:response to virus; C:cell wall; F:zinc ion binding; P:protein folding; P:response to salt stress; P:response to heat; C:vacuolar membrane; F:ATP binding; F:unfolded protein binding; C:chloroplast; P:response to cadmium ion	molecular chaperone DnaK
Gb_36068	DnaK	Longevity regulating	223.282	168.916	-0.402566	Down	0.00685	0.0301294	yes	K04043	P:response to virus; C:cell wall; F:zinc ion binding; P:protein folding; P:response to salt stress; P:response to heat; C:vacuolar membrane; F:ATP binding; F:unfolded protein binding; C:chloroplast; P:response to cadmium ion	molecular chaperone DnaK
Gb_35390	GroEL	Longevity regulating	226.112	142.026	-0.670887	Down	5e-05	0.000439452	yes	K04077	F:copper ion binding; P:protein refolding; C:chloroplast envelope; P:response to heat; C:vacuolar membrane; F:ATP binding; C:chloroplast stroma; C:mitochondrial matrix; P:response to cadmium ion; C:cytosolic ribosome; C:plasma membrane	chaperonin GroEL
Gb_37654	GroEL	Longevity regulating	136.051	84.0411	-0.694983	Down	5e-05	0.000439452	yes	K04077	F:copper ion binding; P:protein refolding; C:chloroplast envelope; P:response to heat; C:vacuolar membrane; F:ATP binding; C:chloroplast stroma; C:mitochondrial matrix; P:response to cadmium ion; C:cytosolic ribosome; C:plasma membrane	chaperonin GroEL
Gb_13206	CLPP	Longevity regulating	34.3375	23.3063	-0.559068	Down	0.0012	0.00715249	yes	K01358	F:serine-type endopeptidase activity; C:chloroplastic endopeptidase Clp complex; F:cobalt ion binding; P:proteolysis; F:zinc ion binding; C:chloroplast thylakoid membrane; C:mitochondrion	ATP-dependent Clp protease, protease subunit [EC:3.4.21.92]
Gb_11393	SEC61B	Phagosome	112.818	78.552	-0.522277	Down	0.0002	0.00152891	yes	K09481	C:plasma membrane; C:Golgi apparatus	protein transport protein SEC61 subunit beta
Gb_30969	SEC22	Phagosome	0.683262	0.18465	-1.88764	Down	0.0124	0.0484066	yes	K08517	C:integral component of membrane; C:plasma membrane; P:vesicle-mediated transport	vesicle transport protein SEC22
Gb_10890	CNX1	Phagosome	238.082	154.121	-0.627394	Down	5e-05	0.000439452	yes	K08054	P:protein folding; C:plant-type cell wall; C:plasmodesma; C:plasma membrane; C:vacuolar membrane; F:calcium ion binding; F:unfolded protein binding; C:chloroplast; C:endoplasmic reticulum; C:mitochondrion	calnexin
Gb_34343	CALR	Phagosome	514.073	377.9	-0.44397	Down	0.0034	0.0171284	yes	K08057	P:protein folding; P:calcium ion homeostasis; P:response to oxidative stress; P:response to cadmium ion; C:plasmodesma; C:vacuolar membrane; F:calcium ion binding; F:unfolded protein binding; C:chloroplast; C:apoplast; C:endoplasmic reticulum; P:response to salt stress; C:mitochondrion	calreticulin family protein
Gb_37391	CALR3	Phagosome	46.9983	33.6248	-0.483081	Down	0.00045	0.00310795	yes	K10098	P:protein folding; C:endoplasmic reticulum; F:unfolded protein binding; F:calcium ion binding	calreticulin-3-like
